# Supplementary material for: Gas-phase Förster resonance energy transfer in mass-selected ions with methylene or peptide linkers between two dyes: a concerted dance of charges
Source: Royal Society of Chemistry journal article supplement (doi:10.1039/d0cp01287d), 2020-01-01

## Electronic Supporting Information

### Gas-phase Förster resonance energy transfer in mass-selected ions with methylene or peptide linkers between two dyes: A concerted dance of charges

Christina Kjær, Ying Zhao, Mark H. Stockett, Li Chen, Klavs Hansen and Steen Brøndsted Nielsen

#### NMR charts for R575-DAB and R575-R640

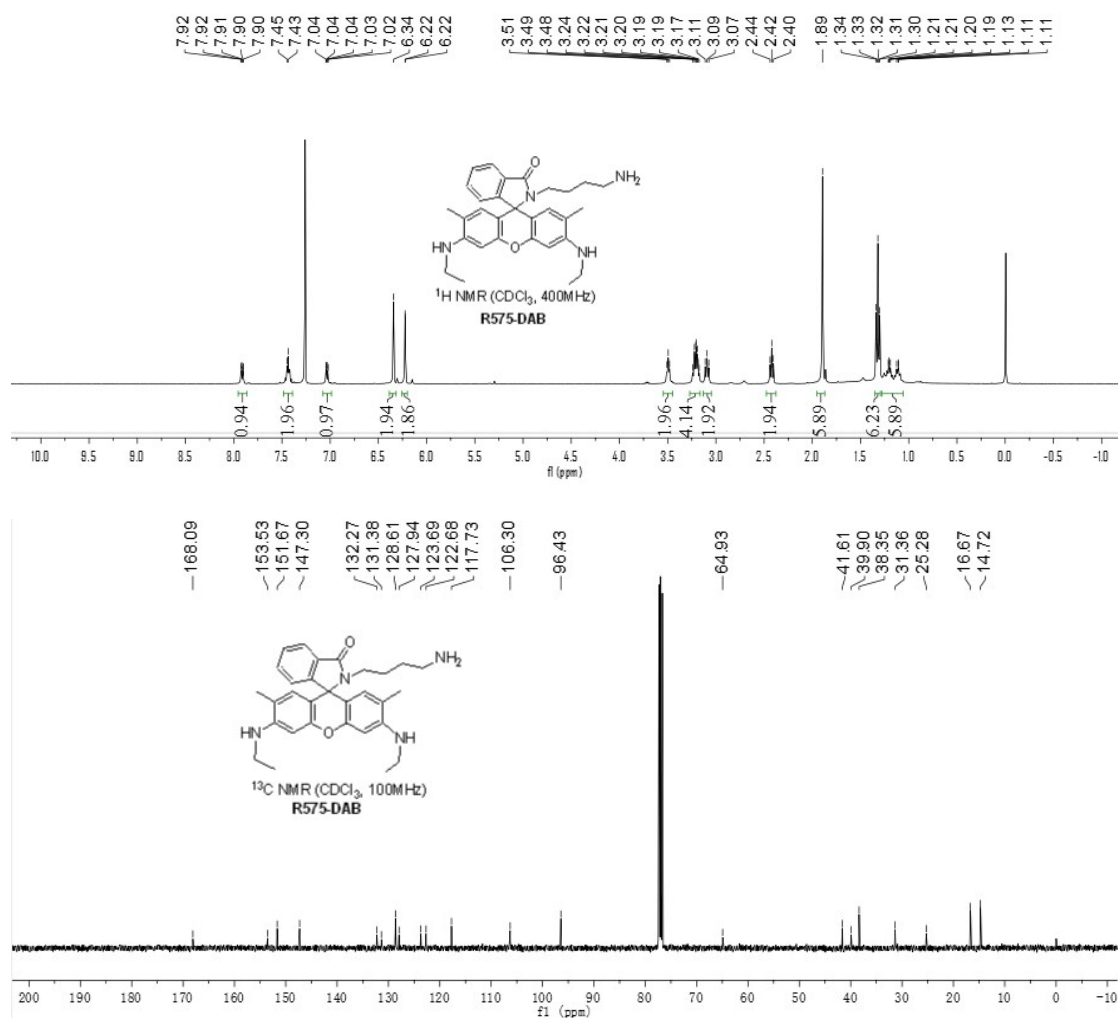

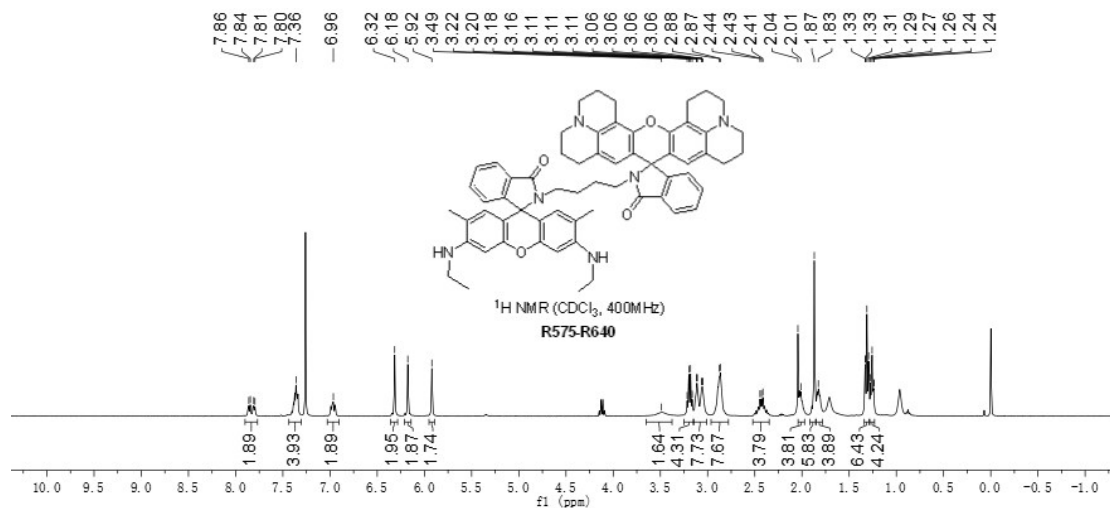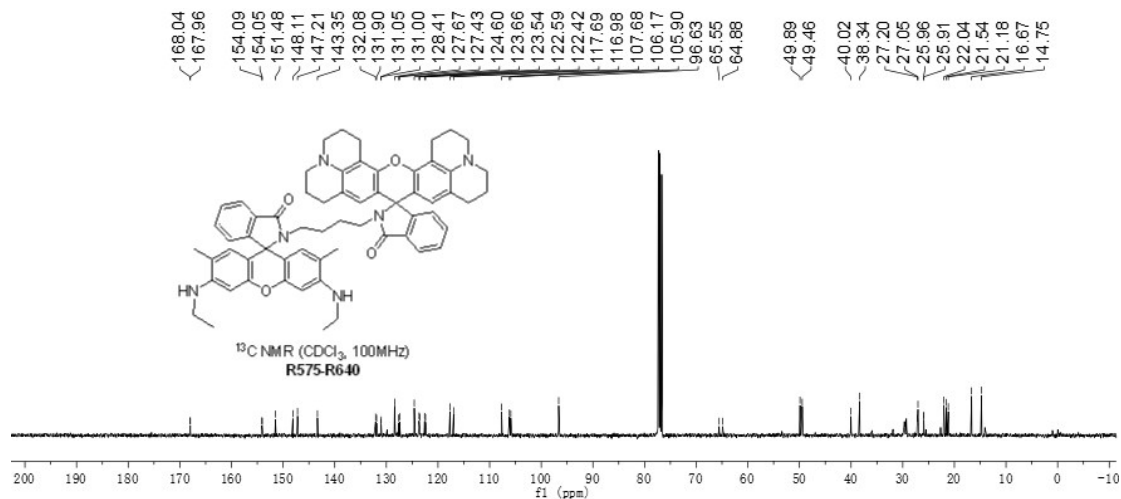

Supplement: d0cp01287d1.pdf [file d0cp01287d1.pdf]
